# Supplementary material for: A dendritic single-molecule fluorescent probe that is monovalent, photostable and minimally blinking
Source: Springer Nature journal article supplement (doi:10.1038/nchem.1706), 2013-06-28
Supplement: 41557_2013_BFnchem1706_MOESM23_ESM.mol [file 41557_2013_BFnchem1706_MOESM23_ESM.mol]

  ChemDraw06131309242D

321333  0  0  0  0  0  0  0  0999 V2000
    3.1478   -1.8600    0.0000 C   0  0  0  0  0  0  0  0  0  0  0  0
    3.6426   -2.7171    0.0000 C   0  0  0  0  0  0  0  0  0  0  0  0
    3.1478   -3.5743    0.0000 C   0  0  0  0  0  0  0  0  0  0  0  0
    3.6426   -4.4314    0.0000 C   0  0  0  0  0  0  0  0  0  0  0  0
    3.1478   -5.2886    0.0000 C   0  0  0  0  0  0  0  0  0  0  0  0
    3.6426   -6.1457    0.0000 N   0  0  0  0  0  0  0  0  0  0  0  0
    8.5669    0.8048    0.0000 C   0  0  0  0  0  0  0  0  0  0  0  0
    9.5567    0.8048    0.0000 N   0  0  0  0  0  0  0  0  0  0  0  0
    9.5567   -0.9094    0.0000 N   0  3  0  0  0  0  0  0  0  0  0  0
    8.5669   -0.9094    0.0000 C   0  0  0  0  0  0  0  0  0  0  0  0
    8.0721   -0.0523    0.0000 C   0  0  0  0  0  0  0  0  0  0  0  0
    9.8625   -1.8510    0.0000 C   0  0  0  0  0  0  0  0  0  0  0  0
    9.0618   -2.4325    0.0000 C   0  0  0  0  0  0  0  0  0  0  0  0
    8.2611   -1.8510    0.0000 C   0  0  0  0  0  0  0  0  0  0  0  0
    8.2611    1.7457    0.0000 C   0  0  0  0  0  0  0  0  0  0  0  0
    9.0618    2.3279    0.0000 C   0  0  0  0  0  0  0  0  0  0  0  0
    9.8625    1.7457    0.0000 C   0  0  0  0  0  0  0  0  0  0  0  0
   10.6633   -2.4325    0.0000 C   0  0  0  0  0  0  0  0  0  0  0  0
   10.3574   -3.3734    0.0000 C   0  0  0  0  0  0  0  0  0  0  0  0
    9.3677   -3.3734    0.0000 O   0  0  0  0  0  0  0  0  0  0  0  0
    9.3677    3.2695    0.0000 O   0  0  0  0  0  0  0  0  0  0  0  0
   10.3574    3.2695    0.0000 C   0  0  0  0  0  0  0  0  0  0  0  0
   10.6633    2.3279    0.0000 C   0  0  0  0  0  0  0  0  0  0  0  0
   10.9368   -4.1714    0.0000 C   0  0  0  0  0  0  0  0  0  0  0  0
    7.0858   -0.0523    0.0000 C   0  0  0  0  0  0  0  0  0  0  0  0
    6.5909   -0.9094    0.0000 C   0  0  0  0  0  0  0  0  0  0  0  0
    5.6012   -0.9094    0.0000 C   0  0  0  0  0  0  0  0  0  0  0  0
    5.1063   -0.0523    0.0000 C   0  0  0  0  0  0  0  0  0  0  0  0
    5.6012    0.8048    0.0000 C   0  0  0  0  0  0  0  0  0  0  0  0
    6.5909    0.8048    0.0000 C   0  0  0  0  0  0  0  0  0  0  0  0
    4.1200   -0.0523    0.0000 C   0  0  0  0  0  0  0  0  0  0  0  0
    3.6265    0.8021    0.0000 O   0  0  0  0  0  0  0  0  0  0  0  0
   10.2234   -0.0523    0.0000 B   0  5  0  0  0  0  0  0  0  0  0  0
   10.9231    0.6474    0.0000 F   0  0  0  0  0  0  0  0  0  0  0  0
   10.9231   -0.7520    0.0000 F   0  0  0  0  0  0  0  0  0  0  0  0
   10.9375    4.0668    0.0000 C   0  0  0  0  0  0  0  0  0  0  0  0
   11.9266   -4.1714    0.0000 C   0  0  0  0  0  0  0  0  0  0  0  0
   12.4214   -5.0285    0.0000 C   0  0  0  0  0  0  0  0  0  0  0  0
   11.9266   -5.8856    0.0000 C   0  0  0  0  0  0  0  0  0  0  0  0
   10.9368   -5.8856    0.0000 C   0  0  0  0  0  0  0  0  0  0  0  0
   10.4420   -5.0285    0.0000 C   0  0  0  0  0  0  0  0  0  0  0  0
   10.4426    4.9239    0.0000 C   0  0  0  0  0  0  0  0  0  0  0  0
   10.9375    5.7810    0.0000 C   0  0  0  0  0  0  0  0  0  0  0  0
   11.9273    5.7810    0.0000 C   0  0  0  0  0  0  0  0  0  0  0  0
   12.4221    4.9239    0.0000 C   0  0  0  0  0  0  0  0  0  0  0  0
   11.9273    4.0668    0.0000 C   0  0  0  0  0  0  0  0  0  0  0  0
    3.6269   -0.9065    0.0000 N   0  0  0  0  0  0  0  0  0  0  0  0
    3.1478   -7.0028    0.0000 C   0  0  0  0  0  0  0  0  0  0  0  0
    3.6426   -7.8600    0.0000 C   0  0  0  0  0  0  0  0  0  0  0  0
    3.1478   -8.7171    0.0000 C   0  0  0  0  0  0  0  0  0  0  0  0
    3.6426   -9.5743    0.0000 C   0  0  0  0  0  0  0  0  0  0  0  0
    3.1478  -10.4314    0.0000 C   0  0  0  0  0  0  0  0  0  0  0  0
    2.1615   -7.0028    0.0000 O   0  0  0  0  0  0  0  0  0  0  0  0
    2.1616   -1.8741    0.0000 C   0  0  0  0  0  0  0  0  0  0  0  0
    1.6807   -2.7353    0.0000 O   0  0  0  0  0  0  0  0  0  0  0  0
    1.4844   -0.9126    0.0000 N   0  0  0  0  0  0  0  0  0  0  0  0
    3.6409  -11.2856    0.0000 C   0  0  0  0  0  0  0  0  0  0  0  0
    4.6252  -11.3890    0.0000 S   0  0  0  0  0  0  0  0  0  0  0  0
    4.8310  -12.3571    0.0000 C   0  0  0  0  0  0  0  0  0  0  0  0
    3.9739  -12.8520    0.0000 C   0  0  0  0  0  0  0  0  0  0  0  0
    3.2384  -12.1897    0.0000 C   0  0  0  0  0  0  0  0  0  0  0  0
    3.5713  -13.7562    0.0000 N   0  0  0  0  0  0  0  0  0  0  0  0
    2.5870  -13.6527    0.0000 C   0  0  0  0  0  0  0  0  0  0  0  0
    2.3812  -12.6846    0.0000 N   0  0  0  0  0  0  0  0  0  0  0  0
    1.9270  -14.3857    0.0000 O   0  0  0  0  0  0  0  0  0  0  0  0
    0.7008   -0.5429    0.0000 C   0  0  0  0  0  0  0  0  0  0  0  0
    1.1118    0.1689    0.0000 C   0  0  0  0  0  0  0  0  0  0  0  0
   -0.1211   -0.5430    0.0000 C   0  0  0  0  0  0  0  0  0  0  0  0
    0.2898    0.1689    0.0000 C   0  0  0  0  0  0  0  0  0  0  0  0
    0.7008    0.8807    0.0000 O   0  0  0  0  0  0  0  0  0  0  0  0
   -0.5321   -1.2547    0.0000 O   0  0  0  0  0  0  0  0  0  0  0  0
    1.1118    1.5925    0.0000 C   0  0  0  0  0  0  0  0  0  0  0  0
   -0.5321    0.1689    0.0000 O   0  0  0  0  0  0  0  0  0  0  0  0
   -0.9430    0.8807    0.0000 C   0  0  0  0  0  0  0  0  0  0  0  0
   -1.3540   -1.2547    0.0000 C   0  0  0  0  0  0  0  0  0  0  0  0
    0.7008    2.3043    0.0000 C   0  0  0  0  0  0  0  0  0  0  0  0
   -1.7650    0.8807    0.0000 C   0  0  0  0  0  0  0  0  0  0  0  0
   -1.7650   -1.9666    0.0000 C   0  0  0  0  0  0  0  0  0  0  0  0
   -1.4295   -2.7200    0.0000 C   0  0  0  0  0  0  0  0  0  0  0  0
   -2.0424   -3.2719    0.0000 N   0  0  0  0  0  0  0  0  0  0  0  0
   -2.7567   -2.8595    0.0000 N   0  0  0  0  0  0  0  0  0  0  0  0
   -2.5852   -2.0528    0.0000 N   0  0  0  0  0  0  0  0  0  0  0  0
   -2.2497    0.2134    0.0000 N   0  0  0  0  0  0  0  0  0  0  0  0
   -3.0342    0.4683    0.0000 N   0  0  0  0  0  0  0  0  0  0  0  0
   -3.0342    1.2930    0.0000 N   0  0  0  0  0  0  0  0  0  0  0  0
   -2.2497    1.5479    0.0000 C   0  0  0  0  0  0  0  0  0  0  0  0
   -0.1195    2.3905    0.0000 N   0  0  0  0  0  0  0  0  0  0  0  0
   -0.2909    3.1972    0.0000 N   0  0  0  0  0  0  0  0  0  0  0  0
    0.4233    3.6096    0.0000 N   0  0  0  0  0  0  0  0  0  0  0  0
    1.0363    3.0577    0.0000 C   0  0  0  0  0  0  0  0  0  0  0  0
    0.5093    4.4271    0.0000 C   0  0  0  0  0  0  0  0  0  0  0  0
   -1.9565   -4.0893    0.0000 C   0  0  0  0  0  0  0  0  0  0  0  0
   -5.3862   -2.9695    0.0000 O   0  0  0  0  0  0  0  0  0  0  0  0
   -6.1615   -2.6871    0.0000 C   0  0  0  0  0  0  0  0  0  0  0  0
   -6.7934   -3.2174    0.0000 C   0  0  0  0  0  0  0  0  0  0  0  0
   -7.5686   -2.9350    0.0000 C   0  0  0  0  0  0  0  0  0  0  0  0
   -8.2005   -3.4654    0.0000 O   0  0  0  0  0  0  0  0  0  0  0  0
   -8.9752   -3.1831    0.0000 C   0  0  0  0  0  0  0  0  0  0  0  0
   -9.6077   -3.7133    0.0000 C   0  0  0  0  0  0  0  0  0  0  0  0
  -10.3831   -3.4315    0.0000 C   0  0  0  0  0  0  0  0  0  0  0  0
  -11.0143   -3.9614    0.0000 O   0  0  0  0  0  0  0  0  0  0  0  0
   -9.3942   -4.5102    0.0000 O   0  0  0  0  0  0  0  0  0  0  0  0
   -7.9483   -5.0249    0.0000 C   0  0  0  0  0  0  0  0  0  0  0  0
   -8.7606   -5.1684    0.0000 C   0  0  0  0  0  0  0  0  0  0  0  0
   -9.0435   -5.9429    0.0000 O   0  0  0  0  0  0  0  0  0  0  0  0
   -7.5358   -5.7394    0.0000 O   0  0  0  0  0  0  0  0  0  0  0  0
   -7.6580   -4.2933    0.0000 C   0  0  0  0  0  0  0  0  0  0  0  0
   -6.9862   -4.0191    0.0000 O   0  0  0  0  0  0  0  0  0  0  0  0
   -5.9797   -6.0143    0.0000 O   0  0  0  0  0  0  0  0  0  0  0  0
   -6.7984   -6.1151    0.0000 C   0  0  0  0  0  0  0  0  0  0  0  0
   -7.1204   -6.8744    0.0000 C   0  0  0  0  0  0  0  0  0  0  0  0
   -7.9395   -6.9746    0.0000 C   0  0  0  0  0  0  0  0  0  0  0  0
   -8.2617   -7.7344    0.0000 O   0  0  0  0  0  0  0  0  0  0  0  0
   -9.0803   -7.8353    0.0000 C   0  0  0  0  0  0  0  0  0  0  0  0
   -9.4023   -8.5946    0.0000 C   0  0  0  0  0  0  0  0  0  0  0  0
  -10.2214   -8.6947    0.0000 C   0  0  0  0  0  0  0  0  0  0  0  0
  -10.5440   -9.4538    0.0000 O   0  0  0  0  0  0  0  0  0  0  0  0
   -8.9898   -9.3090    0.0000 O   0  0  0  0  0  0  0  0  0  0  0  0
   -7.4563   -9.0101    0.0000 C   0  0  0  0  0  0  0  0  0  0  0  0
   -8.0165   -9.6164    0.0000 C   0  0  0  0  0  0  0  0  0  0  0  0
   -7.7714  -10.4037    0.0000 O   0  0  0  0  0  0  0  0  0  0  0  0
   -6.6594   -9.2236    0.0000 O   0  0  0  0  0  0  0  0  0  0  0  0
   -7.5297   -8.3533    0.0000 C   0  0  0  0  0  0  0  0  0  0  0  0
   -6.9275   -7.6768    0.0000 O   0  0  0  0  0  0  0  0  0  0  0  0
   -2.1939   -8.0677    0.0000 O   0  0  0  0  0  0  0  0  0  0  0  0
   -2.4959   -8.8356    0.0000 C   0  0  0  0  0  0  0  0  0  0  0  0
   -1.9832   -9.4811    0.0000 C   0  0  0  0  0  0  0  0  0  0  0  0
   -2.2262  -10.2691    0.0000 C   0  0  0  0  0  0  0  0  0  0  0  0
   -1.6661  -10.8739    0.0000 O   0  0  0  0  0  0  0  0  0  0  0  0
   -1.9090  -11.6624    0.0000 C   0  0  0  0  0  0  0  0  0  0  0  0
   -1.3490  -12.2673    0.0000 C   0  0  0  0  0  0  0  0  0  0  0  0
   -1.5919  -13.0552    0.0000 C   0  0  0  0  0  0  0  0  0  0  0  0
   -1.0318  -13.6600    0.0000 O   0  0  0  0  0  0  0  0  0  0  0  0
   -0.5521  -12.0537    0.0000 O   0  0  0  0  0  0  0  0  0  0  0  0
   -0.1209  -10.5463    0.0000 C   0  0  0  0  0  0  0  0  0  0  0  0
    0.0617  -11.3505    0.0000 C   0  0  0  0  0  0  0  0  0  0  0  0
    0.8502  -11.5940    0.0000 O   0  0  0  0  0  0  0  0  0  0  0  0
    0.4624   -9.9630    0.0000 O   0  0  0  0  0  0  0  0  0  0  0  0
   -0.8659  -10.2921    0.0000 C   0  0  0  0  0  0  0  0  0  0  0  0
   -1.1726   -9.6342    0.0000 O   0  0  0  0  0  0  0  0  0  0  0  0
   -4.5377   -8.4624    0.0000 O   0  0  0  0  0  0  0  0  0  0  0  0
   -5.1161   -9.0504    0.0000 C   0  0  0  0  0  0  0  0  0  0  0  0
   -4.8951   -9.8452    0.0000 C   0  0  0  0  0  0  0  0  0  0  0  0
   -5.4741  -10.4332    0.0000 C   0  0  0  0  0  0  0  0  0  0  0  0
   -5.2531  -11.2286    0.0000 O   0  0  0  0  0  0  0  0  0  0  0  0
   -5.8322  -11.8166    0.0000 C   0  0  0  0  0  0  0  0  0  0  0  0
   -5.6111  -12.6115    0.0000 C   0  0  0  0  0  0  0  0  0  0  0  0
   -6.1901  -13.1995    0.0000 C   0  0  0  0  0  0  0  0  0  0  0  0
   -6.0947  -14.0174    0.0000 O   0  0  0  0  0  0  0  0  0  0  0  0
   -4.8142  -12.8250    0.0000 O   0  0  0  0  0  0  0  0  0  0  0  0
   -3.7303  -11.6471    0.0000 C   0  0  0  0  0  0  0  0  0  0  0  0
   -3.9370  -12.4455    0.0000 C   0  0  0  0  0  0  0  0  0  0  0  0
   -3.3489  -13.0234    0.0000 O   0  0  0  0  0  0  0  0  0  0  0  0
   -2.9334  -11.4336    0.0000 O   0  0  0  0  0  0  0  0  0  0  0  0
   -4.2754  -11.0783    0.0000 C   0  0  0  0  0  0  0  0  0  0  0  0
   -4.2457  -10.3533    0.0000 O   0  0  0  0  0  0  0  0  0  0  0  0
   -3.2352   -6.6732    0.0000 C   0  0  0  0  0  0  0  0  0  0  0  0
   -3.0865   -7.4819    0.0000 C   0  0  0  0  0  0  0  0  0  0  0  0
   -2.0618   -5.5888    0.0000 C   0  0  0  0  0  0  0  0  0  0  0  0
   -2.2742   -4.7948    0.0000 C   0  0  0  0  0  0  0  0  0  0  0  0
   -2.6427   -6.1702    0.0000 O   0  0  0  0  0  0  0  0  0  0  0  0
   -3.0676   -4.5822    0.0000 O   0  0  0  0  0  0  0  0  0  0  0  0
   -4.0912   -7.6396    0.0000 C   0  0  0  0  0  0  0  0  0  0  0  0
   -3.6472   -5.1610    0.0000 C   0  0  0  0  0  0  0  0  0  0  0  0
   -4.5142   -4.9287    0.0000 C   0  0  0  0  0  0  0  0  0  0  0  0
   -4.5142   -3.4083    0.0000 C   0  0  0  0  0  0  0  0  0  0  0  0
   -3.2738    6.7886    0.0000 O   0  0  0  0  0  0  0  0  0  0  0  0
   -3.4168    7.6012    0.0000 C   0  0  0  0  0  0  0  0  0  0  0  0
   -4.1921    7.8833    0.0000 C   0  0  0  0  0  0  0  0  0  0  0  0
   -4.3351    8.6959    0.0000 C   0  0  0  0  0  0  0  0  0  0  0  0
   -5.1104    8.9779    0.0000 O   0  0  0  0  0  0  0  0  0  0  0  0
   -5.2533    9.7900    0.0000 C   0  0  0  0  0  0  0  0  0  0  0  0
   -6.0287   10.0726    0.0000 C   0  0  0  0  0  0  0  0  0  0  0  0
   -6.1723   10.8850    0.0000 C   0  0  0  0  0  0  0  0  0  0  0  0
   -6.9469   11.1667    0.0000 O   0  0  0  0  0  0  0  0  0  0  0  0
   -6.6121    9.4892    0.0000 O   0  0  0  0  0  0  0  0  0  0  0  0
   -6.3349    7.9798    0.0000 C   0  0  0  0  0  0  0  0  0  0  0  0
   -6.8653    8.6115    0.0000 C   0  0  0  0  0  0  0  0  0  0  0  0
   -7.6774    8.4692    0.0000 O   0  0  0  0  0  0  0  0  0  0  0  0
   -6.5484    7.1829    0.0000 O   0  0  0  0  0  0  0  0  0  0  0  0
   -5.5561    8.0942    0.0000 C   0  0  0  0  0  0  0  0  0  0  0  0
   -4.9828    7.6495    0.0000 O   0  0  0  0  0  0  0  0  0  0  0  0
   -6.2074    5.7802    0.0000 O   0  0  0  0  0  0  0  0  0  0  0  0
   -6.7041    6.4387    0.0000 C   0  0  0  0  0  0  0  0  0  0  0  0
   -7.5227    6.3380    0.0000 C   0  0  0  0  0  0  0  0  0  0  0  0
   -8.0189    6.9972    0.0000 C   0  0  0  0  0  0  0  0  0  0  0  0
   -8.8381    6.8963    0.0000 O   0  0  0  0  0  0  0  0  0  0  0  0
   -9.3347    7.5549    0.0000 C   0  0  0  0  0  0  0  0  0  0  0  0
  -10.1533    7.4541    0.0000 C   0  0  0  0  0  0  0  0  0  0  0  0
  -10.6496    8.1134    0.0000 C   0  0  0  0  0  0  0  0  0  0  0  0
   -9.4766    5.4509    0.0000 C   0  0  0  0  0  0  0  0  0  0  0  0
  -10.1090    5.8376    0.0000 C   0  0  0  0  0  0  0  0  0  0  0  0
  -10.8949    5.2779    0.0000 O   0  0  0  0  0  0  0  0  0  0  0  0
   -9.4766    4.6259    0.0000 O   0  0  0  0  0  0  0  0  0  0  0  0
   -8.8343    5.9065    0.0000 C   0  0  0  0  0  0  0  0  0  0  0  0
   -8.1211    5.7697    0.0000 O   0  0  0  0  0  0  0  0  0  0  0  0
   -6.3126    1.7554    0.0000 O   0  0  0  0  0  0  0  0  0  0  0  0
   -7.1372    1.7835    0.0000 C   0  0  0  0  0  0  0  0  0  0  0  0
   -7.5743    1.0847    0.0000 C   0  0  0  0  0  0  0  0  0  0  0  0
   -8.3984    1.1129    0.0000 C   0  0  0  0  0  0  0  0  0  0  0  0
   -8.8356    0.4140    0.0000 O   0  0  0  0  0  0  0  0  0  0  0  0
   -9.6602    0.4421    0.0000 C   0  0  0  0  0  0  0  0  0  0  0  0
  -10.0974   -0.2567    0.0000 C   0  0  0  0  0  0  0  0  0  0  0  0
  -10.9214   -0.2285    0.0000 C   0  0  0  0  0  0  0  0  0  0  0  0
  -11.3586   -0.9273    0.0000 O   0  0  0  0  0  0  0  0  0  0  0  0
   -9.6849   -0.9712    0.0000 O   0  0  0  0  0  0  0  0  0  0  0  0
   -8.1150   -0.9915    0.0000 C   0  0  0  0  0  0  0  0  0  0  0  0
   -8.8434   -1.3782    0.0000 C   0  0  0  0  0  0  0  0  0  0  0  0
   -8.8720   -2.2030    0.0000 O   0  0  0  0  0  0  0  0  0  0  0  0
   -7.4006   -1.4040    0.0000 O   0  0  0  0  0  0  0  0  0  0  0  0
   -8.0646   -0.2060    0.0000 C   0  0  0  0  0  0  0  0  0  0  0  0
   -7.5099    0.2623    0.0000 O   0  0  0  0  0  0  0  0  0  0  0  0
   -7.4675    3.8327    0.0000 O   0  0  0  0  0  0  0  0  0  0  0  0
   -8.2150    4.1815    0.0000 C   0  0  0  0  0  0  0  0  0  0  0  0
   -8.8903    3.7076    0.0000 C   0  0  0  0  0  0  0  0  0  0  0  0
   -9.6379    4.0569    0.0000 C   0  0  0  0  0  0  0  0  0  0  0  0
  -10.3138    3.5829    0.0000 O   0  0  0  0  0  0  0  0  0  0  0  0
  -11.0615    3.9323    0.0000 C   0  0  0  0  0  0  0  0  0  0  0  0
  -11.7368    3.4584    0.0000 C   0  0  0  0  0  0  0  0  0  0  0  0
  -12.4844    3.8077    0.0000 C   0  0  0  0  0  0  0  0  0  0  0  0
  -13.1599    3.3344    0.0000 O   0  0  0  0  0  0  0  0  0  0  0  0
  -11.7368    2.6334    0.0000 O   0  0  0  0  0  0  0  0  0  0  0  0
  -10.1995    2.0078    0.0000 C   0  0  0  0  0  0  0  0  0  0  0  0
  -11.0211    1.9359    0.0000 C   0  0  0  0  0  0  0  0  0  0  0  0
  -11.3693    1.1885    0.0000 O   0  0  0  0  0  0  0  0  0  0  0  0
   -9.7870    1.2933    0.0000 O   0  0  0  0  0  0  0  0  0  0  0  0
   -9.8455    2.7116    0.0000 C   0  0  0  0  0  0  0  0  0  0  0  0
   -9.1522    2.9258    0.0000 O   0  0  0  0  0  0  0  0  0  0  0  0
   -5.3460    3.2027    0.0000 C   0  0  0  0  0  0  0  0  0  0  0  0
   -6.0585    2.7924    0.0000 C   0  0  0  0  0  0  0  0  0  0  0  0
   -3.6672    1.8060    0.0000 C   0  0  0  0  0  0  0  0  0  0  0  0
   -3.8800    2.5999    0.0000 C   0  0  0  0  0  0  0  0  0  0  0  0
   -3.2986    3.1809    0.0000 C   0  0  0  0  0  0  0  0  0  0  0  0
   -4.6739    2.8123    0.0000 O   0  0  0  0  0  0  0  0  0  0  0  0
   -3.5111    3.9742    0.0000 O   0  0  0  0  0  0  0  0  0  0  0  0
   -6.6702    4.0463    0.0000 C   0  0  0  0  0  0  0  0  0  0  0  0
   -4.3022    4.1868    0.0000 C   0  0  0  0  0  0  0  0  0  0  0  0
   -4.5345    5.0538    0.0000 C   0  0  0  0  0  0  0  0  0  0  0  0
   -3.2178    5.8140    0.0000 C   0  0  0  0  0  0  0  0  0  0  0  0
   -1.9113    6.6768    0.0000 O   0  0  0  0  0  0  0  0  0  0  0  0
   -2.5435    7.2069    0.0000 C   0  0  0  0  0  0  0  0  0  0  0  0
   -2.4002    8.0194    0.0000 C   0  0  0  0  0  0  0  0  0  0  0  0
   -3.0324    8.5495    0.0000 C   0  0  0  0  0  0  0  0  0  0  0  0
   -2.8890    9.3620    0.0000 O   0  0  0  0  0  0  0  0  0  0  0  0
   -3.5208    9.8917    0.0000 C   0  0  0  0  0  0  0  0  0  0  0  0
   -3.3778   10.7046    0.0000 C   0  0  0  0  0  0  0  0  0  0  0  0
   -4.0097   11.2351    0.0000 C   0  0  0  0  0  0  0  0  0  0  0  0
   -3.8663   12.0468    0.0000 O   0  0  0  0  0  0  0  0  0  0  0  0
   -2.7752   10.9436    0.0000 O   0  0  0  0  0  0  0  0  0  0  0  0
   -1.4123    9.9233    0.0000 C   0  0  0  0  0  0  0  0  0  0  0  0
   -1.6942   10.6985    0.0000 C   0  0  0  0  0  0  0  0  0  0  0  0
   -1.1649   11.3307    0.0000 O   0  0  0  0  0  0  0  0  0  0  0  0
   -0.6155    9.7098    0.0000 O   0  0  0  0  0  0  0  0  0  0  0  0
   -1.9008    9.3061    0.0000 C   0  0  0  0  0  0  0  0  0  0  0  0
   -1.8024    8.5872    0.0000 O   0  0  0  0  0  0  0  0  0  0  0  0
    0.4288    8.7132    0.0000 O   0  0  0  0  0  0  0  0  0  0  0  0
    0.1068    9.4725    0.0000 C   0  0  0  0  0  0  0  0  0  0  0  0
    0.6034   10.1311    0.0000 C   0  0  0  0  0  0  0  0  0  0  0  0
    0.2806   10.8905    0.0000 C   0  0  0  0  0  0  0  0  0  0  0  0
    0.7775   11.5494    0.0000 O   0  0  0  0  0  0  0  0  0  0  0  0
    0.4556   12.3088    0.0000 C   0  0  0  0  0  0  0  0  0  0  0  0
    0.9521   12.9674    0.0000 C   0  0  0  0  0  0  0  0  0  0  0  0
    0.6293   13.7267    0.0000 C   0  0  0  0  0  0  0  0  0  0  0  0
    1.1254   14.3857    0.0000 O   0  0  0  0  0  0  0  0  0  0  0  0
    1.7293   12.9662    0.0000 O   0  0  0  0  0  0  0  0  0  0  0  0
    2.1578   11.4433    0.0000 C   0  0  0  0  0  0  0  0  0  0  0  0
    2.2579   12.2626    0.0000 C   0  0  0  0  0  0  0  0  0  0  0  0
    3.0168   12.5850    0.0000 O   0  0  0  0  0  0  0  0  0  0  0  0
    2.8723   11.0308    0.0000 O   0  0  0  0  0  0  0  0  0  0  0  0
    1.6329   11.0513    0.0000 C   0  0  0  0  0  0  0  0  0  0  0  0
    1.3948   10.3652    0.0000 O   0  0  0  0  0  0  0  0  0  0  0  0
    3.9670    6.7918    0.0000 O   0  0  0  0  0  0  0  0  0  0  0  0
    4.3550    7.5200    0.0000 C   0  0  0  0  0  0  0  0  0  0  0  0
    5.1787    7.5492    0.0000 C   0  0  0  0  0  0  0  0  0  0  0  0
    5.5663    8.2770    0.0000 C   0  0  0  0  0  0  0  0  0  0  0  0
    6.3901    8.3061    0.0000 O   0  0  0  0  0  0  0  0  0  0  0  0
    6.7781    9.0343    0.0000 C   0  0  0  0  0  0  0  0  0  0  0  0
    7.6019    9.0635    0.0000 C   0  0  0  0  0  0  0  0  0  0  0  0
    7.9895    9.7913    0.0000 C   0  0  0  0  0  0  0  0  0  0  0  0
    8.8133    9.8204    0.0000 O   0  0  0  0  0  0  0  0  0  0  0  0
    8.0144    8.3490    0.0000 O   0  0  0  0  0  0  0  0  0  0  0  0
    7.2471    6.9793    0.0000 C   0  0  0  0  0  0  0  0  0  0  0  0
    7.9462    7.4167    0.0000 C   0  0  0  0  0  0  0  0  0  0  0  0
    8.6748    7.0291    0.0000 O   0  0  0  0  0  0  0  0  0  0  0  0
    7.2471    6.1543    0.0000 O   0  0  0  0  0  0  0  0  0  0  0  0
    6.5416    7.3284    0.0000 C   0  0  0  0  0  0  0  0  0  0  0  0
    5.8588    7.0822    0.0000 O   0  0  0  0  0  0  0  0  0  0  0  0
    2.7455    8.8306    0.0000 O   0  0  0  0  0  0  0  0  0  0  0  0
    2.8172    9.6524    0.0000 C   0  0  0  0  0  0  0  0  0  0  0  0
    3.5652   10.0003    0.0000 C   0  0  0  0  0  0  0  0  0  0  0  0
    3.6365   10.8224    0.0000 C   0  0  0  0  0  0  0  0  0  0  0  0
    4.3849   11.1707    0.0000 O   0  0  0  0  0  0  0  0  0  0  0  0
    4.4562   11.9929    0.0000 C   0  0  0  0  0  0  0  0  0  0  0  0
    5.2043   12.3408    0.0000 C   0  0  0  0  0  0  0  0  0  0  0  0
    5.2755   13.1630    0.0000 C   0  0  0  0  0  0  0  0  0  0  0  0
    6.0232   13.5113    0.0000 O   0  0  0  0  0  0  0  0  0  0  0  0
    5.9187   11.9283    0.0000 O   0  0  0  0  0  0  0  0  0  0  0  0
    5.6919   10.2842    0.0000 C   0  0  0  0  0  0  0  0  0  0  0  0
    6.1649   10.9597    0.0000 C   0  0  0  0  0  0  0  0  0  0  0  0
    6.9863   10.8876    0.0000 O   0  0  0  0  0  0  0  0  0  0  0  0
    6.1044    9.5697    0.0000 O   0  0  0  0  0  0  0  0  0  0  0  0
    4.9054   10.3295    0.0000 C   0  0  0  0  0  0  0  0  0  0  0  0
    4.3732    9.8362    0.0000 O   0  0  0  0  0  0  0  0  0  0  0  0
    2.2303    6.6784    0.0000 C   0  0  0  0  0  0  0  0  0  0  0  0
    2.9419    7.0903    0.0000 C   0  0  0  0  0  0  0  0  0  0  0  0
    2.0193    5.1074    0.0000 C   0  0  0  0  0  0  0  0  0  0  0  0
    1.2255    4.8943    0.0000 C   0  0  0  0  0  0  0  0  0  0  0  0
    2.2323    5.9012    0.0000 O   0  0  0  0  0  0  0  0  0  0  0  0
    0.6447    5.4751    0.0000 O   0  0  0  0  0  0  0  0  0  0  0  0
    2.1618    8.2470    0.0000 C   0  0  0  0  0  0  0  0  0  0  0  0
    0.8561    6.2665    0.0000 C   0  0  0  0  0  0  0  0  0  0  0  0
    0.2215    6.9012    0.0000 C   0  0  0  0  0  0  0  0  0  0  0  0
   -1.0952    6.1410    0.0000 C   0  0  0  0  0  0  0  0  0  0  0  0
  -10.3668    6.6572    0.0000 O   0  0  0  0  0  0  0  0  0  0  0  0
  -11.4235    7.7845    0.0000 O   0  0  0  0  0  0  0  0  0  0  0  0
    4.6441  -13.4612    0.0000 H   0  0  0  0  0  0  0  0  0  0  0  0
    2.5681  -11.5806    0.0000 H   0  0  0  0  0  0  0  0  0  0  0  0
   12.3384    6.4931    0.0000 O   0  0  0  0  0  0  0  0  0  0  0  0
   11.9273    7.2051    0.0000 C   0  0  0  0  0  0  0  0  0  0  0  0
   12.3377   -6.5976    0.0000 O   0  0  0  0  0  0  0  0  0  0  0  0
   13.1599   -6.5976    0.0000 C   0  0  0  0  0  0  0  0  0  0  0  0
  1  2  1  0      
  2  3  1  0      
  3  4  1  0      
  4  5  1  0      
  5  6  1  0      
  7  8  1  0      
  9 10  1  0      
 10 11  2  0      
 11  7  1  0      
  9 12  2  0      
 12 13  1  0      
 13 14  2  0      
 16 17  2  0      
 17  8  1  0      
 12 18  1  0      
 18 19  2  0      
 19 20  1  0      
 20 13  1  0      
 16 21  1  0      
 21 22  1  0      
 22 23  2  0      
 23 17  1  0      
 15  7  2  0      
 10 14  1  0      
 19 24  1  0      
 11 25  1  0      
 25 26  2  0      
 26 27  1  0      
 27 28  2  0      
 28 29  1  0      
 29 30  2  0      
 30 25  1  0      
 16 15  1  0      
 28 31  1  0      
 31 32  2  0      
  8 33  1  0      
 33  9  1  0      
 33 34  1  0      
 33 35  1  0      
 22 36  1  0      
 24 37  2  0      
 37 38  1  0      
 38 39  2  0      
 39 40  1  0      
 40 41  2  0      
 41 24  1  0      
 36 42  2  0      
 42 43  1  0      
 43 44  2  0      
 44 45  1  0      
 45 46  2  0      
 46 36  1  0      
 44318  1  0      
 39320  1  0      
 31 47  1  0      
 47  1  1  0      
  6 48  1  0      
 48 49  1  0      
 49 50  1  0      
 50 51  1  0      
 51 52  1  0      
 48 53  2  0      
  1 54  1  0      
 54 55  2  0      
 54 56  1  0      
 57 58  1  0      
 58 59  1  0      
 59 60  1  0      
 60 61  1  0      
 61 57  1  0      
 60 62  1  0      
 62 63  1  0      
 63 64  1  0      
 64 61  1  0      
 63 65  2  0      
 66 67  1  0      
 66 68  1  0      
 66 69  1  0      
 67 70  1  0      
 68 71  1  0      
 70 72  1  0      
 69 73  1  0      
 73 74  1  0      
 71 75  1  0      
 72 76  1  0      
 74 77  1  0      
 75 78  1  0      
 78 79  2  0      
 79 80  1  0      
 80 81  1  0      
 81 82  2  0      
 82 78  1  0      
 77 83  1  0      
 83 84  2  0      
 84 85  1  0      
 85 86  1  0      
 86 77  2  0      
 76 87  1  0      
 87 88  2  0      
 88 89  1  0      
 89 90  1  0      
 90 76  2  0      
 89 91  1  0      
 80 92  1  0      
 93 94  1  0      
 94 95  1  0      
 95 96  1  0      
 96 97  1  0      
 97 98  1  0      
 98 99  1  0      
 99100  1  0      
100101  1  0      
 99102  1  0      
103104  1  0      
104105  1  0      
103106  1  0      
103107  1  0      
 95108  1  0      
108107  1  0      
109110  1  0      
110111  1  0      
111112  1  0      
112113  1  0      
113114  1  0      
114115  1  0      
115116  1  0      
116117  1  0      
115118  1  0      
119120  1  0      
120121  1  0      
119122  1  0      
119123  1  0      
111124  1  0      
124123  1  0      
125126  1  0      
126127  1  0      
127128  1  0      
128129  1  0      
129130  1  0      
130131  1  0      
131132  1  0      
132133  1  0      
131134  1  0      
135136  1  0      
136137  1  0      
135138  1  0      
135139  1  0      
127140  1  0      
140139  1  0      
141142  1  0      
142143  1  0      
143144  1  0      
144145  1  0      
145146  1  0      
146147  1  0      
147148  1  0      
148149  1  0      
147150  1  0      
151152  1  0      
152153  1  0      
151154  1  0      
151155  1  0      
143156  1  0      
156155  1  0      
157158  1  0      
159160  1  0      
159161  1  0      
160162  1  0      
161157  1  0      
125158  1  0      
141163  1  0      
162164  1  0      
164165  1  0      
165109  1  0      
165166  1  0      
166 93  1  0      
158163  1  0      
167168  1  0      
168169  1  0      
169170  1  0      
170171  1  0      
171172  1  0      
172173  1  0      
173174  1  0      
174175  1  0      
173176  1  0      
177178  1  0      
178179  1  0      
177180  1  0      
177181  1  0      
169182  1  0      
182181  1  0      
183184  1  0      
184185  1  0      
185186  1  0      
186187  1  0      
187188  1  0      
188189  1  0      
189190  1  0      
191192  1  0      
192193  1  0      
191194  1  0      
191195  1  0      
185196  1  0      
196195  1  0      
197198  1  0      
198199  1  0      
199200  1  0      
200201  1  0      
201202  1  0      
202203  1  0      
203204  1  0      
204205  1  0      
203206  1  0      
207208  1  0      
208209  1  0      
207210  1  0      
207211  1  0      
199212  1  0      
212211  1  0      
213214  1  0      
214215  1  0      
215216  1  0      
216217  1  0      
217218  1  0      
218219  1  0      
219220  1  0      
220221  1  0      
219222  1  0      
223224  1  0      
224225  1  0      
223226  1  0      
223227  1  0      
215228  1  0      
228227  1  0      
229230  1  0      
231232  1  0      
232233  1  0      
232234  1  0      
233235  1  0      
234229  1  0      
197230  1  0      
213236  1  0      
235237  1  0      
237238  1  0      
238183  1  0      
238239  1  0      
239167  1  0      
230236  1  0      
240241  1  0      
241242  1  0      
242243  1  0      
243244  1  0      
244245  1  0      
245246  1  0      
246247  1  0      
247248  1  0      
246249  1  0      
250251  1  0      
251252  1  0      
250253  1  0      
250254  1  0      
242255  1  0      
255254  1  0      
256257  1  0      
257258  1  0      
258259  1  0      
259260  1  0      
260261  1  0      
261262  1  0      
262263  1  0      
263264  1  0      
262265  1  0      
266267  1  0      
267268  1  0      
266269  1  0      
266270  1  0      
258271  1  0      
271270  1  0      
272273  1  0      
273274  1  0      
274275  1  0      
275276  1  0      
276277  1  0      
277278  1  0      
278279  1  0      
279280  1  0      
278281  1  0      
282283  1  0      
283284  1  0      
282285  1  0      
282286  1  0      
274287  1  0      
287286  1  0      
288289  1  0      
289290  1  0      
290291  1  0      
291292  1  0      
292293  1  0      
293294  1  0      
294295  1  0      
295296  1  0      
294297  1  0      
298299  1  0      
299300  1  0      
298301  1  0      
298302  1  0      
290303  1  0      
303302  1  0      
304305  1  0      
306307  1  0      
306308  1  0      
307309  1  0      
308304  1  0      
272305  1  0      
288310  1  0      
309311  1  0      
311312  1  0      
312256  1  0      
312313  1  0      
313240  1  0      
305310  1  0      
 85231  1  0      
307 91  1  0      
 92160  1  0      
189314  1  0      
190315  1  0      
 56 66  1  0      
 60316  1  1      
 61317  1  1      
 57 52  1  6      
318319  1  0      
320321  1  0      
M  CHG  2   9   1  33  -1
M  END
